# Supplementary material for: Theoretical studies on glycolysis of poly(ethylene terephthalate) in ionic liquids
Source: Royal Society of Chemistry journal article supplement (doi:10.1039/c7ra13173a), 2018-01-01
Supplement: c7ra13173a1.pdf [file c7ra13173a1.pdf]

## Supporting Information

### **Theoretical Studies on Glycolysis of Poly (ethylene terephthalate) in Ionic Liquids**

Zhaoyang Ju<sup>a,b</sup>, Weihua Xiao<sup>a</sup>, Xingmei Lu<sup>b</sup>, Xiaomin Liu<sup>b</sup>, Xiaoqian Yao<sup>b\*</sup>,  
Xiaochun Zhang<sup>b</sup> and Suojiang Zhang<sup>b\*</sup>

<sup>a</sup> *College of Engineering, China Agricultural University, Beijing 100083, P. R. China*

<sup>b</sup> *Key Laboratory of Green Process and Engineering, Beijing Key Laboratory of Ionic Liquids Clean Process, State Key Laboratory of Multiphase Complex Systems, Institute of Process Engineering, Chinese Academy of Sciences, Beijing 100190, PR China*

As predicting the reactive site at molecular surface is of theoretical and practical significance, many prediction methods based on the electrochemical structure of reactants have been proposed such as quantitative molecular surface analysis of electronic potential (ESP). The electrostatic potential surfaces for the most stable geometries of cation, anion, EG and dimer are given in Fig. S1. As is shown, the highly negative region of anion is on the electronegative carboxyl group and the electrostatic potential values of  $\text{OAc}^-$ ,  $\text{Ala}^-$ ,  $\text{Asp}^-$ , and  $\text{Ser}^-$  are -0.247, -0.236, -0.227, -0.233 a.u., respectively. Because of the symmetrical structure in the  $\text{N}_{1111}^+$  and  $\text{N}_{2222}^+$ , the highly positive areas are 0.162 and 0.196 a.u. around the nitrogen. In the imidazolium cations, the highly positive of  $\text{Amim}^+$ ,  $\text{C}_3\text{mim}^+$ ,  $\text{Bmim}^+$ ,  $\text{C}_4\text{dmim}^+$  are 0.193, 0.192, 0.191 and 0.173 a.u., respectively. The ESP value in dimer which around the electronegative carbonyl group is -0.051 a.u. The most positive and negative ESP values in EG are 0.072, -0.050 a.u., respectively.

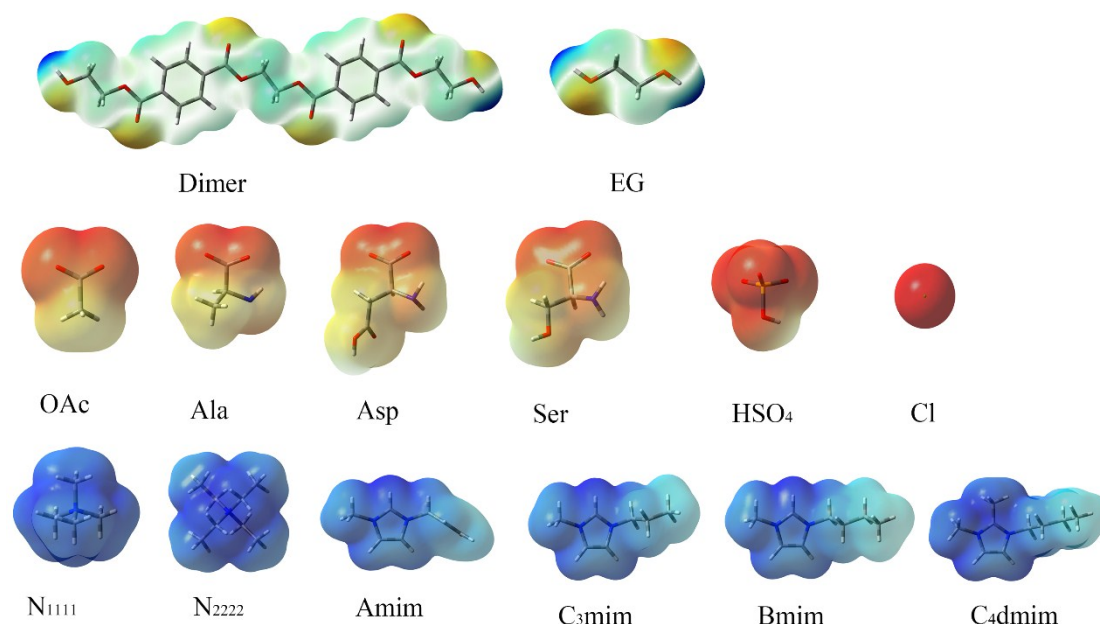

Fig. S1 The electrostatic potential surface of Dimer, EG anions and cations.

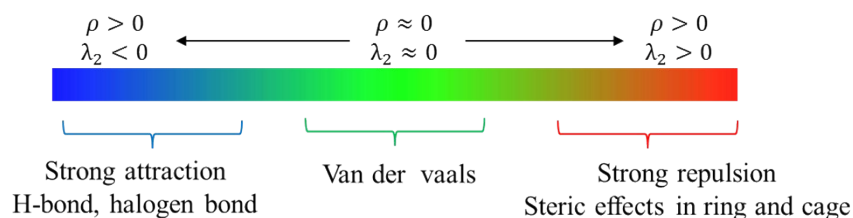

Fig. S2 Clarification of non-bonding interaction.

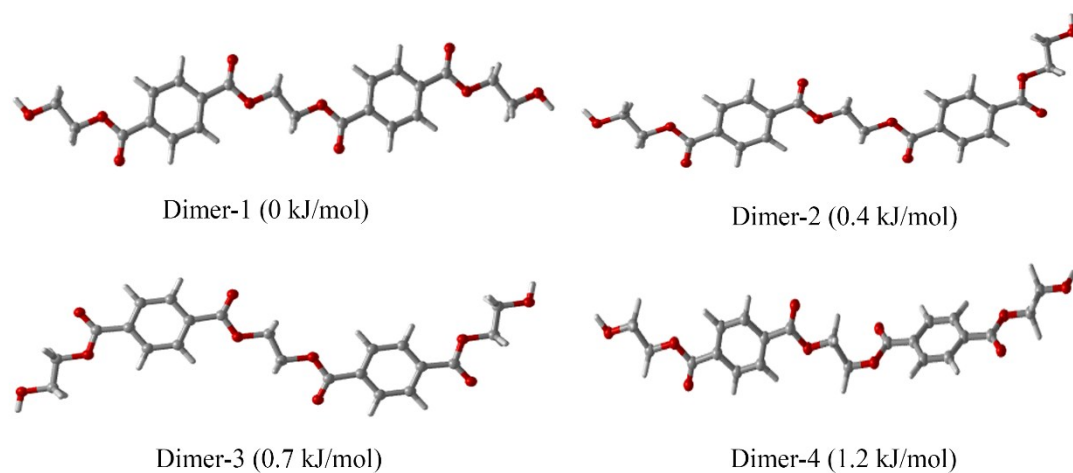

Fig. S3 Conformational isomers of Dimer model compound, and the relative energies to Dimer-1 are labeled in parentheses.

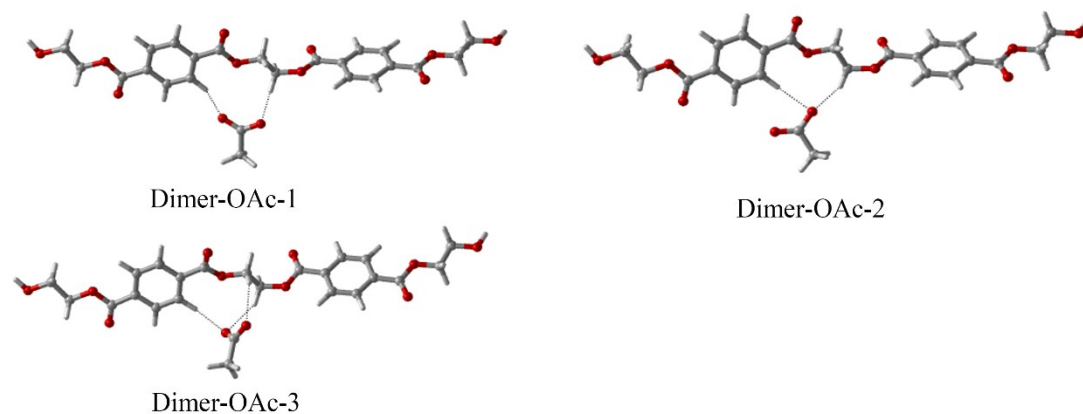

Fig. S4 The optimized configurations of Dimer-OAc-n (n=1-7) at B3LYP/6-31++G\*\* level. The hydrogen bonds are indicated by dashed lines

Table S1 Hydrogen bonds and interaction energy between model compound and OAc

| Structures  | H bonding     | Length[Å] | Angle [°] | $\Delta E$ (kJ/mol) | $\Delta\Delta E$ (kJ/mol) |
|-------------|---------------|-----------|-----------|---------------------|---------------------------|
| Dimer-OAc-1 | C3-H8...O62   | 2.054     | 160.92    | -78.97              | 0                         |
|             | C18-H20...O61 | 2.012     | 175.60    |                     |                           |
| Der-OAc-2   | C3-H8...O62   | 2.279     | 168.29    | -72.81              | 6.16                      |
|             | C18-H20...O62 | 2.085     | 155.62    |                     |                           |
| Dimer-OAc-3 | C3-H8...O62   | 2.214     | 164.20    | -75.94              | 3.03                      |
|             | C18-H20...O62 | 2.325     | 151.06    |                     |                           |
|             | C15-H17...O61 | 2.450     | 122.81    |                     |                           |

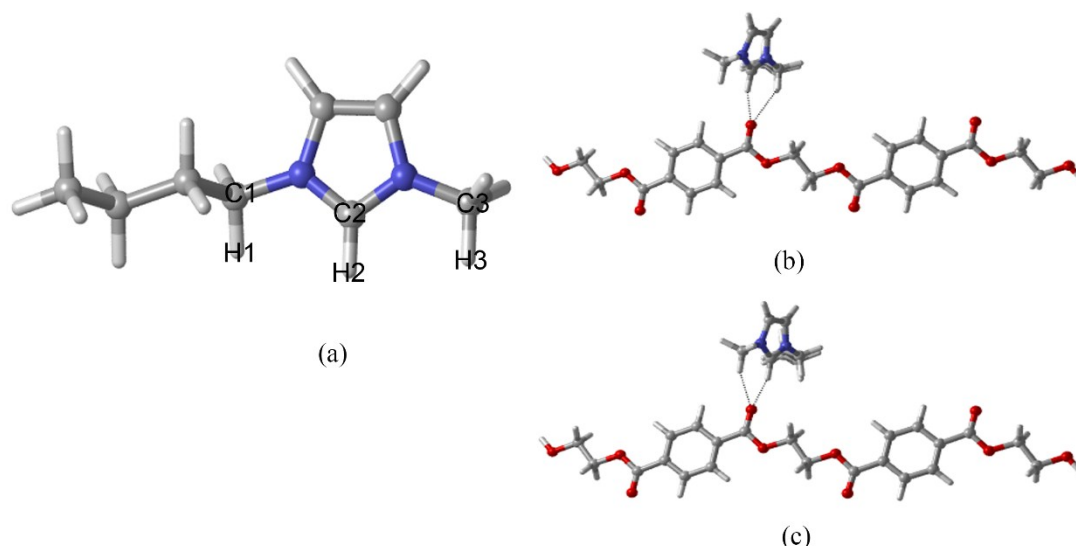

Fig. S5 The most stable structures of Dimer-Bmim<sup>+</sup> model compound. (a) the structure of Bmim<sup>+</sup> (b) indicate the interaction of Dimer-Bmim<sup>+</sup> with C3-H3...O13 and C2-H2...O13 H-bonds (c) means the interaction of Dimer-Bmim<sup>+</sup> with C1-H1...O13 and C2-H2...O13 H-bonds; All structures were optimized at the B3LYP/6-31++G\*\* level.

Table S2 Hydrogen bonds and interaction energy between model compound and Bmim<sup>+</sup>

| Structures | H bonding   | Length[Å] | Angle [°] | ΔE (kJ/mol) | ΔΔE (kJ/mol) |
|------------|-------------|-----------|-----------|-------------|--------------|
| (b)        | C2-H2...O13 | 2.002     | 160.00    | -43.27      | 0            |
|            | C1-H1...O13 | 2.785     | 142.43    |             |              |
| (c)        | C2-H2...O13 | 2.059     | 150.78    | -42.17      | 1.1          |
|            | C3-H3...O13 | 2.692     | 146.84    |             |              |

Table S3 H-bond lengths and angles of Dimer-anions/cations conformers at the level of B3LYP/6-31++G\*\* and B3LYP-D3/6-311+G\*\*

| Structure               | B3LYP/6-31++G** |           |           | B3LYP-D3/6-311+G** |           |           |
|-------------------------|-----------------|-----------|-----------|--------------------|-----------|-----------|
|                         | H-bond          | Length(Å) | Angle (°) | H-bond             | Length(Å) | Angle (°) |
| Dimer-OAc               | C3-H8...O62     | 2.054     | 160.92    | C3-H8...O62        | 2.139     | 153.56    |
|                         | C18-H20...O61   | 2.012     | 175.60    | C18-H20...O61      | 2.149     | 159.71    |
| Dimer-Ala               | C3-H8...O62     | 2.077     | 160.99    | C3-H8...O62        | 2.141     | 156.03    |
|                         | C18-H20...O61   | 2.044     | 177.27    | C18-H20...O61      | 2.175     | 176.39    |
| Dimer-Asp               | C3-H8...O62     | 2.106     | 158.86    | C3-H8...O62        | 2.098     | 147.98    |
|                         | C18-H20...O61   | 2.056     | 176.81    | C18-H20...O61      | 2.208     | 158.54    |
| Dimer-Ser               | C3-H8...O61     | 2.086     | 158.86    | C3-H8...O61        | 2.285     | 146.25    |
|                         | C18-H20...O60   | 2.043     | 176.81    | C18-H20...O60      | 2.109     | 165.87    |
| Dimer-Cl                | C3-H8...Cl55    | 2.555     | 166.21    | C3-H8...Cl55       | 2.589     | 152.58    |
|                         | C18-H20...Cl55  | 2.467     | 159.61    | C18-H20...Cl55     | 2.533     | 140.19    |
| Dimer-HSO <sub>4</sub>  | C3-H8...O58     | 2.167     | 151.95    | C3-H8...O58        | 2.077     | 152.33    |
|                         | C18-H20...O57   | 2.214     | 166.05    | C18-H20...O57      | 2.276     | 146.24    |
| Dimer-N <sub>1111</sub> | C55-H56...O24   | 2.367     | 145.55    | C55-H56...O24      | 2.282     | 143.48    |
|                         | C68-H70...O24   | 2.357     | 146.02    | C68-H70...O24      | 2.265     | 144.21    |

|                           |               |       |        |               |       |        |
|---------------------------|---------------|-------|--------|---------------|-------|--------|
| Dimer-N <sub>2222</sub>   | C63-H65...O24 | 2.372 | 145.37 | C63-H65...O24 | 2.286 | 143.38 |
|                           | C65-H67...O24 | 2.419 | 154.61 | C65-H67...O24 | 2.306 | 160.82 |
| Dimer-Amim                | C58-H60...O24 | 2.359 | 156.76 | C58-H60...O24 | 2.355 | 155.31 |
|                           | C2-H2...O24   | 2.001 | 155.10 | C2-H2...O24   | 2.008 | 147.51 |
| Dimer-C <sub>3</sub> mim  | C1-H1...O24   | 2.593 | 147.32 | C1-H1...O24   | 2.351 | 149.49 |
|                           | C2-H2...O24   | 1.996 | 160.84 | C2-H2...O24   | 2.029 | 145.74 |
| Dimer-Bmim                | C1-H1...O24   | 2.813 | 141.46 | C1-H1...O24   | 2.385 | 141.48 |
|                           | C2-H2...O24   | 2.002 | 160.00 | C2-H2...O24   | 2.055 | 143.31 |
| Dimer-C <sub>4</sub> dmim | C1-H1...O24   | 2.785 | 142.43 | C1-H1...O24   | 2.544 | 120.43 |
|                           | C3-H3...O24   | 2.258 | 171.25 | C3-H3...O24   | 2.145 | 173.07 |
|                           | C1-H1...O24   | 2.310 | 171.72 | C1-H1...O24   | 2.359 | 142.59 |

Table S4 The main electron donor-acceptor interactions in the Dimer-anions/cations conformers and their second-order perturbation stabilization energies (E(2)).

| Structure                              | Donor (i) | Acceptor (j)       | E(2) kJ/mol | $\epsilon(i)-\epsilon(j)$ | F(i,j) |
|----------------------------------------|-----------|--------------------|-------------|---------------------------|--------|
| Dimer-OAc <sup>-</sup>                 | LP O61    | $\sigma^*$ C18-H20 | 45.528      | 0.70                      | 0.080  |
|                                        | LP O62    | $\sigma^*$ C3-H8   | 26.628      | 0.71                      | 0.061  |
| Dimer-Ala <sup>-</sup>                 | LP O61    | $\sigma^*$ C18-H20 | 31.248      | 0.70                      | 0.066  |
|                                        | LP O62    | $\sigma^*$ C3-H8   | 24.150      | 0.71                      | 0.058  |
| Dimer-Asp <sup>-</sup>                 | LP O60    | $\sigma^*$ C18-H20 | 26.544      | 0.70                      | 0.061  |
|                                        | LP O61    | $\sigma^*$ C3-H8   | 21.756      | 1.14                      | 0.069  |
| Dimer-Ser <sup>-</sup>                 | LP O60    | $\sigma^*$ C18-H20 | 29.148      | 0.70                      | 0.064  |
|                                        | LP O61    | $\sigma^*$ C3-H8   | 22.386      | 1.13                      | 0.069  |
| Dimer-Cl <sup>-</sup>                  | LP Cl55   | $\sigma^*$ C18-H20 | 28.560      | 0.73                      | 0.063  |
|                                        | LP Cl55   | $\sigma^*$ C3-H8   | 20.034      | 0.67                      | 0.050  |
| Dimer-HSO <sub>4</sub> <sup>-</sup>    | LP O58    | $\sigma^*$ C18-H20 | 9.786       | 0.73                      | 0.038  |
|                                        | LP O57    | $\sigma^*$ C3-H8   | 6.132       | 0.76                      | 0.031  |
| Dimer-N <sub>1111</sub> <sup>+</sup>   | LP O24    | $\sigma^*$ C55-H56 | 7.308       | 1.14                      | 0.040  |
|                                        | LP O24    | $\sigma^*$ C63-H65 | 8.570       | 1.14                      | 0.040  |
|                                        | LP O24    | $\sigma^*$ C68-H70 | 9.618       | 1.14                      | 0.046  |
| Dimer-N <sub>2222</sub> <sup>+</sup>   | LP O24    | $\sigma^*$ C58-H60 | 8.946       | 1.15                      | 0.044  |
|                                        | LP O24    | $\sigma^*$ C65-H67 | 7.098       | 1.14                      | 0.039  |
| Dimer-Amim <sup>+</sup>                | LP O24    | $\sigma^*$ C57-H60 | 35.274      | 1.16                      | 0.087  |
|                                        | LP O24    | $\sigma^*$ C63-H65 | 2.688       | 1.13                      | 0.024  |
| Dimer-C <sub>3</sub> mim <sup>+</sup>  | LP O24    | $\sigma^*$ C57-H60 | 33.810      | 1.15                      | 0.086  |
|                                        | LP O24    | $\sigma^*$ C63-H65 | 1.008       | 1.13                      | 0.015  |
| Dimer-Bmim <sup>+</sup>                | LP O24    | $\sigma^*$ C57-H60 | 26.040      | 1.14                      | 0.075  |
|                                        | LP O24    | $\sigma^*$ C63-H65 | 4.578       | 1.15                      | 0.032  |
| Dimer-C <sub>4</sub> dmim <sup>+</sup> | LP O24    | $\sigma^*$ C79-H81 | 12.642      | 1.14                      | 0.053  |
|                                        | LP O24    | $\sigma^*$ C62-H64 | 11.214      | 1.13                      | 0.050  |

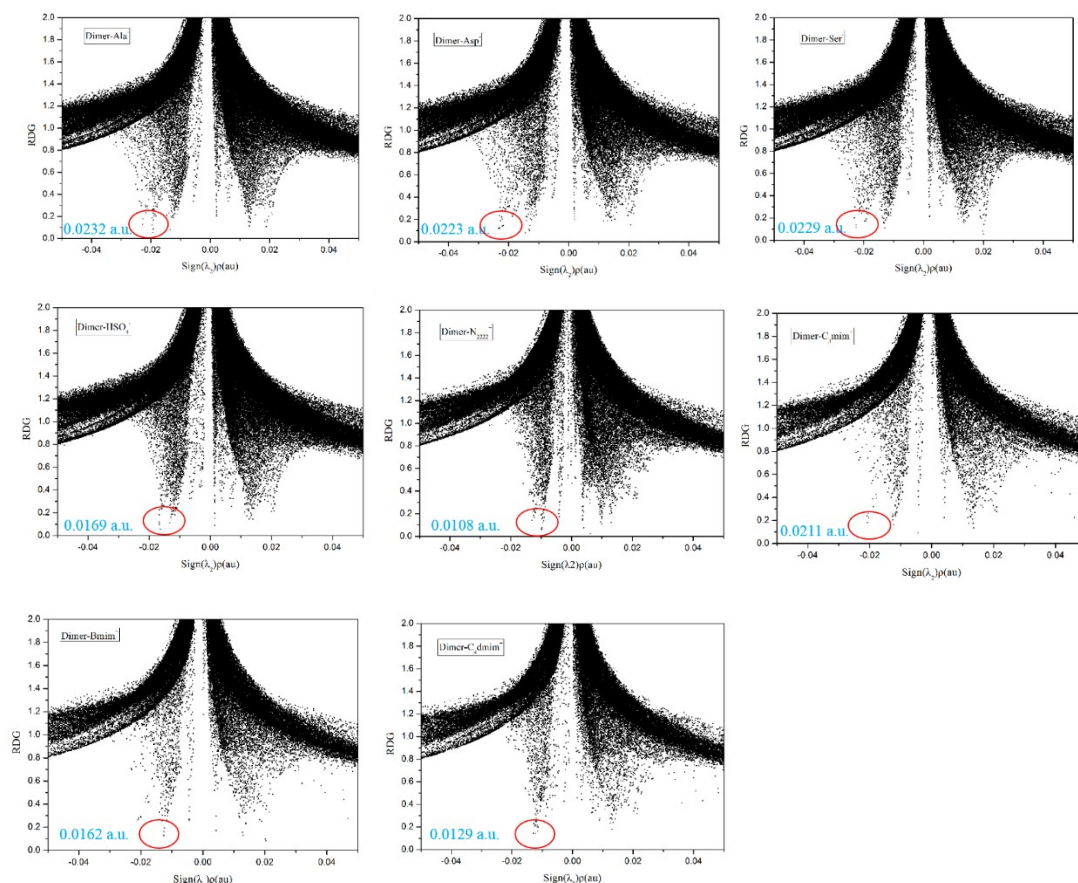

Fig. S6 Scatters of reduced density gradient versus the electron density multiplied by the second Hessian matrix  $\text{sign}(\lambda_2)\rho$  for conformers of interest calculated at B3LYP/6-31++G\*\* level

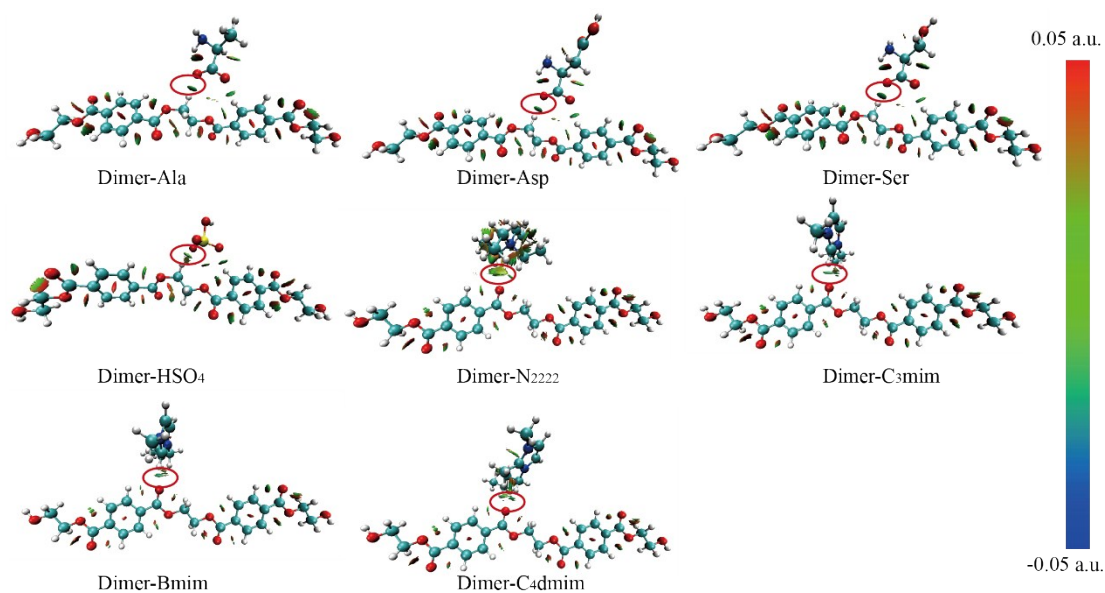

Fig. S7 Reduced density gradient isosurfaces ( $s=0.6$  a.u.) for selected conformers calculated at B3LYP/6-31++G\*\* level. The surfaces colored on a red-green blue scale according to values of  $\text{sign}(\lambda_2)\rho$ . Red indicates strong attractive interactions, and blue indicates strong nonbonded overlap

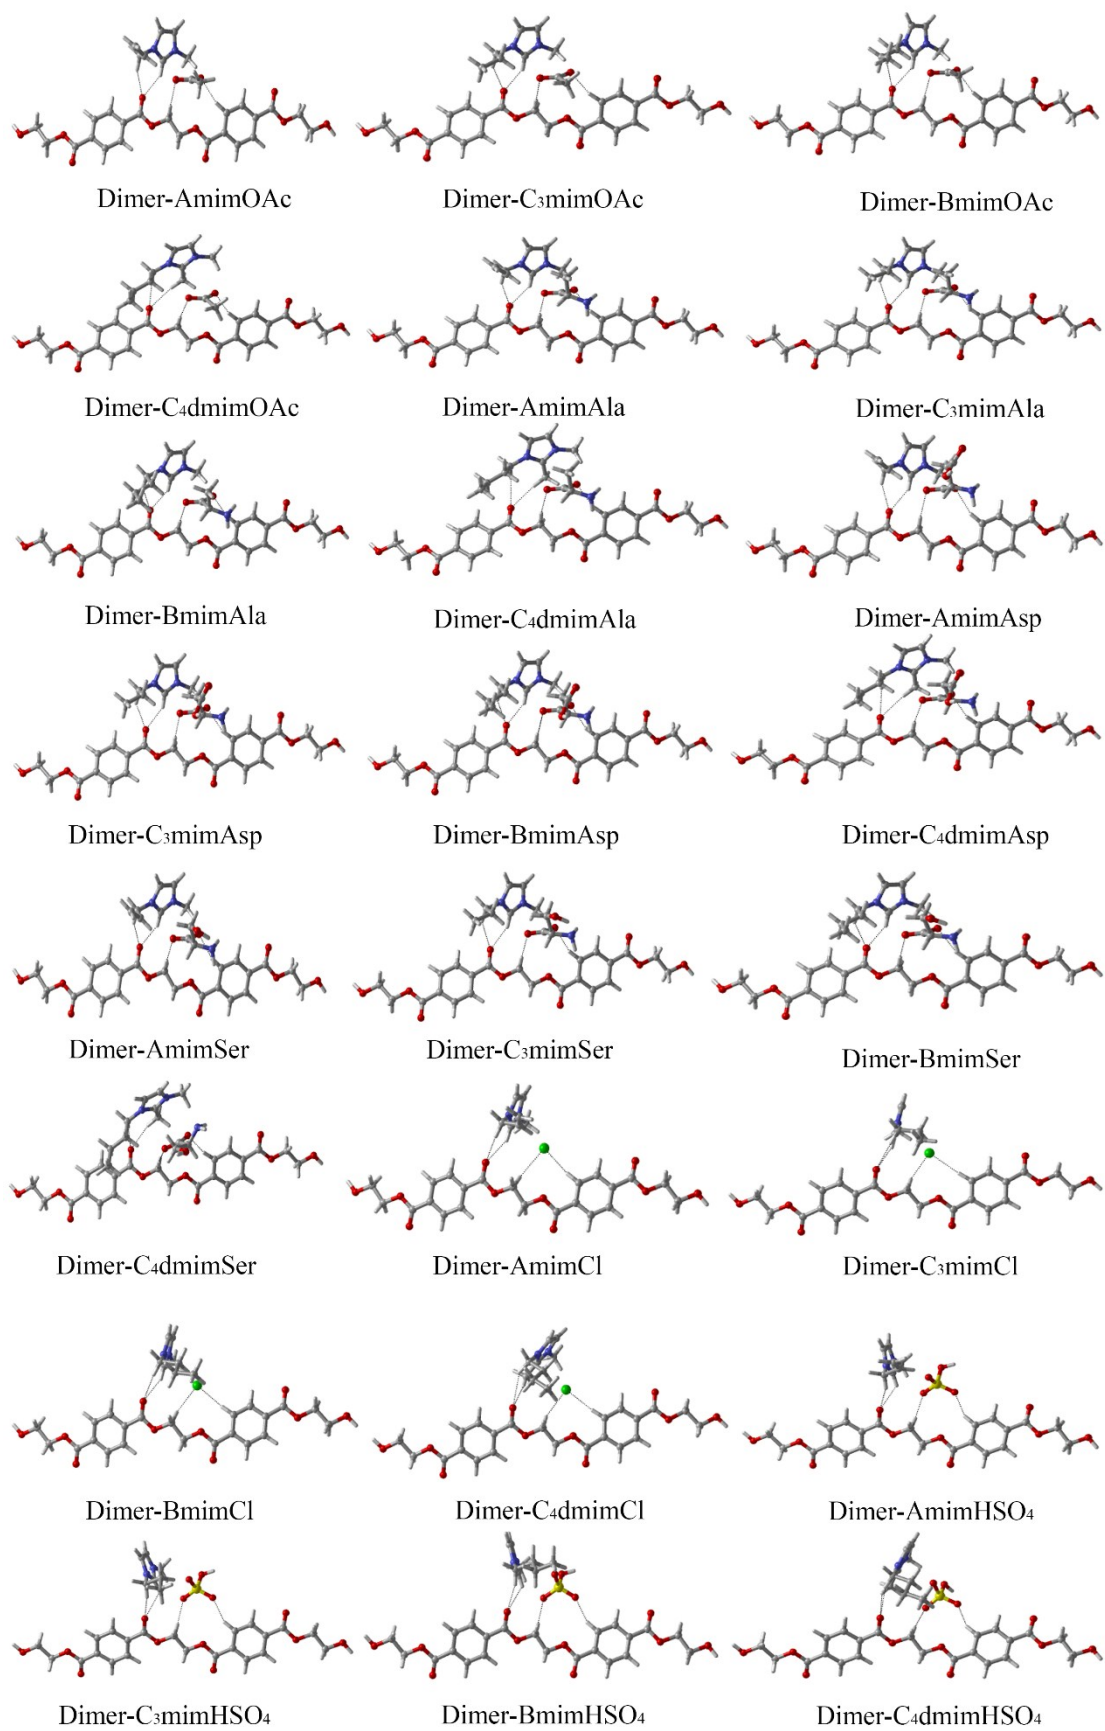

Fig. S8 Results of interaction energy calculation for the 24 kinds of Dimer model compound and ionic

liquids

Table S5 Calculated interaction energy at the B3LYP-D3/6-311+G\*\* level of theory. (D-dimer, C-cation, A-anion, CA-ion pairs)

| Entry | Structures                                | $\Delta E_{CA}$ (kJ/mol) | $\Delta E_{D-CA}$ (kJ/mol) | $\Delta E_{D-C-A}$ (kJ/mol) |
|-------|-------------------------------------------|--------------------------|----------------------------|-----------------------------|
| 1     | Dimer-AmimOAc                             | -415.47                  | -103.18                    | -518.64                     |
| 2     | Dimer-C <sub>3</sub> mimOAc               | -412.32                  | -102.96                    | -515.28                     |
| 3     | Dimer-BmimOAc                             | -410.82                  | -103.41                    | -514.23                     |
| 4     | Dimer-C <sub>4</sub> dmimOAc              | -397.82                  | -108.51                    | -506.32                     |
| 5     | Dimer-AmimAla                             | -418.58                  | -85.41                     | -503.99                     |
| 6     | Dimer-C <sub>3</sub> mimAla               | -418.04                  | -84.10                     | -502.14                     |
| 7     | Dimer-BmimAla                             | -411.65                  | -90.11                     | -501.76                     |
| 8     | Dimer-C <sub>4</sub> dmimAla              | -408.39                  | -84.60                     | -492.99                     |
| 9     | Dimer-AmimAsp                             | -399.24                  | -102.66                    | -501.90                     |
| 10    | Dimer-C <sub>3</sub> mimAsp               | -399.84                  | -98.84                     | -498.68                     |
| 11    | Dimer-BmimAsp                             | -398.67                  | -97.71                     | -496.38                     |
| 12    | Dimer-C <sub>4</sub> dmimAsp              | -393.03                  | -87.68                     | -480.71                     |
| 13    | Dimer-AmimSer                             | -382.61                  | -102.84                    | -485.45                     |
| 14    | Dimer-C <sub>3</sub> mimSer               | -378.65                  | -103.36                    | -482.01                     |
| 15    | Dimer-BmimSer                             | -377.98                  | -103.28                    | -481.26                     |
| 16    | Dimer-C <sub>4</sub> dmimSer              | -384.77                  | -89.58                     | -474.35                     |
| 17    | Dimer-AmimHSO <sub>4</sub>                | -391.04                  | -83.96                     | -475.00                     |
| 18    | Dimer-C <sub>3</sub> mimHSO <sub>4</sub>  | -381.13                  | -90.02                     | -471.15                     |
| 19    | Dimer-BmimHSO <sub>4</sub>                | -381.22                  | -88.04                     | -469.26                     |
| 20    | Dimer-C <sub>4</sub> dmimHSO <sub>4</sub> | -370.00                  | -91.38                     | -461.38                     |
| 21    | Dimer-AmimCl                              | -391.48                  | -74.57                     | -466.05                     |
| 22    | Dimer-C <sub>3</sub> mimCl                | -387.25                  | -76.93                     | -464.18                     |
| 23    | Dimer-BmimCl                              | -386.93                  | -75.48                     | -462.41                     |
| 24    | Dimer-C <sub>4</sub> dmimCl               | -376.77                  | -78.23                     | -455.00                     |

Table S6 H-bond lengths and angles of Dimer-ion pairs conformers at the level of B3LYP/6-31++G\*\* and B3LYP-D3/6-311+G\*\*

| Structure     | B3LYP/6-31++G** |           |           | B3LYP-D3/6-311+G** |           |           |
|---------------|-----------------|-----------|-----------|--------------------|-----------|-----------|
|               | H-bond          | Length(Å) | Angle (°) | H-bond             | Length(Å) | Angle (°) |
| Dimer-AmimOAc | C18-H19...O80   | 2.196     | 170.75    | C18-H19...O80      | 2.706     | 105.99    |
|               | C3-H8...O81     | 2.236     | 164.31    | C3-H8...O81        | 2.345     | 155.69    |
|               | C57-H60...O24   | 2.212     | 147.89    | C57-H60...O24      | 2.102     | 172.56    |
| Dimer-AmimAla | C18-H19...O78   | 2.212     | 172.80    | C18-H19...O78      | 2.305     | 138.38    |
|               | C3-H8...O79     | 2.279     | 159.91    | C3-H8...O79        | 2.676     | 102.82    |
|               | C57-H60...O24   | 2.216     | 147.76    | C57-H60...O24      | 2.244     | 144.25    |
| Dimer-AmimAsp | C18-H19...O78   | 2.239     | 171.09    | C18-H19...O78      | 2.310     | 136.32    |
|               | C3-H8...O79     | 2.305     | 159.12    | C3-H8...O79        | 2.663     | 101.98    |



|                            |                |       |        |                |       |        |
|----------------------------|----------------|-------|--------|----------------|-------|--------|
| Dimer-AmimSer              | C57-H60...O24  | 2.202 | 148.02 | C57-H60...O24  | 2.21  | 145.64 |
|                            | C18-H19...O80  | 2.213 | 172.33 | C18-H19...O80  | 2.340 | 136.52 |
|                            | C3-H8...O81    | 2.318 | 158.11 | C3-H8...O81    | 2.738 | 102.71 |
| Dimer-AmimCl               | C57-H60...O24  | 2.184 | 150.11 | C57-H60...O24  | 2.167 | 117.76 |
|                            | C15-H16...Cl55 | 2.610 | 153.41 | C15-H16...Cl55 | 2.479 | 159.93 |
|                            | C26-H29...Cl55 | 2.853 | 168.60 | C26-H29...Cl55 | 2.722 | 178.63 |
| Dimer-AmimHSO <sub>4</sub> | C58-H61...O13  | 2.271 | 146.41 | C58-H61...O13  | 2.248 | 147.71 |
|                            | C15-H16...O56  | 2.315 | 113.40 | C15-H16...O56  | 2.433 | 141.14 |
|                            | C26-H29...O58  | 2.262 | 153.98 | C26-H29...O58  | 2.152 | 153.37 |
|                            | C63-H66...O13  | 2.401 | 127.48 | C63-H66...O13  | 2.162 | 136.89 |

Table S7 The main donor-acceptor interactions in the process and their second order perturbation stabilization energy E(2) of Dimer-ion pair.

| Structure                  | $\pi$ -stacking interaction, kJ/mol |                    |      | H-bond interaction, kJ/mol |                    |       |
|----------------------------|-------------------------------------|--------------------|------|----------------------------|--------------------|-------|
|                            | Donor                               | Acceptor           | E(2) | Donor (i)                  | Acceptor (j)       | E(2)  |
| Dimer-AmimOAc              | $\pi$ C25-C26                       | $\sigma^*$ C63-H65 | 2.89 | LP O80                     | $\sigma^*$ C18-H19 | 14.83 |
|                            | $\pi$ C25-C26                       | $\pi^*$ C66-C72    | 0.63 | LP O81                     | $\sigma^*$ C3-H8   | 9.87  |
|                            | $\pi$ C25-C26                       | $\pi^*$ C63-C65    | 0.42 | LP O24                     | $\sigma^*$ C57-H60 | 11.80 |
| Dimer-AmimAla              | $\pi$ C25-C26                       | $\sigma^*$ C63-H65 | 2.60 | LP O78                     | $\sigma^*$ C18-H20 | 14.28 |
|                            | $\pi$ C25-C26                       | $\pi^*$ C66-C72    | 0.51 | LP O79                     | $\sigma^*$ C3-H8   | 8.23  |
|                            | $\pi$ C25-C26                       | $\pi^*$ C63-C65    | 0.39 | LPO24                      | $\sigma^*$ C57-H60 | 11.59 |
| Dimer-AmimAsp              | $\pi$ C25-C26                       | $\sigma^*$ C63-H65 | 3.15 | LP O78                     | $\sigma^*$ C18-H20 | 12.94 |
|                            | $\pi$ C25-C26                       | $\pi^*$ C66-C72    | 0.78 | LP O79                     | $\sigma^*$ C3-H8   | 7.31  |
|                            | $\pi$ C25-C26                       | $\pi^*$ C63-C65    | 0.37 | LPO24                      | $\sigma^*$ C57-H60 | 12.47 |
| Dimer-AmimSer              | $\pi$ C25-C26                       | $\sigma^*$ C63-H65 | 3.12 | LP O78                     | $\sigma^*$ C18-H19 | 13.90 |
|                            | $\pi$ C25-C26                       | $\pi^*$ C66-C72    | 0.23 | LP O79                     | $\sigma^*$ C3-H8   | 6.72  |
|                            | $\pi$ C25-C26                       | $\pi^*$ C63-C65    | 0.36 | LP O24                     | $\sigma^*$ C57-H60 | 13.57 |
| Dimer-AmimCl               | $\pi$ C25-C26                       | $\sigma^*$ C63-H65 | 2.56 | LP Cl55                    | $\sigma^*$ C15-H16 | 10.54 |
|                            | $\pi$ C25-C26                       | $\pi^*$ C66-C72    | 0.52 | LP Cl55                    | $\sigma^*$ C26-H19 | 7.06  |
|                            | $\pi$ C25-C26                       | $\pi^*$ C63-C65    | 0.91 | LP O13                     | $\sigma^*$ C58-H61 | 8.82  |
| Dimer-AmimHSO <sub>4</sub> | $\pi$ C25-C26                       | $\sigma^*$ C63-H65 | 2.78 | LP O56                     | $\sigma^*$ C15-H16 | 11.80 |
|                            | $\pi$ C25-C26                       | $\pi^*$ C66-C72    | 0.15 | LP O58                     | $\sigma^*$ C26-H29 | 8.61  |
|                            | $\pi$ C25-C26                       | $\pi^*$ C63-C65    | 0.68 | LP O13                     | $\sigma^*$ C63-H66 | 4.2   |

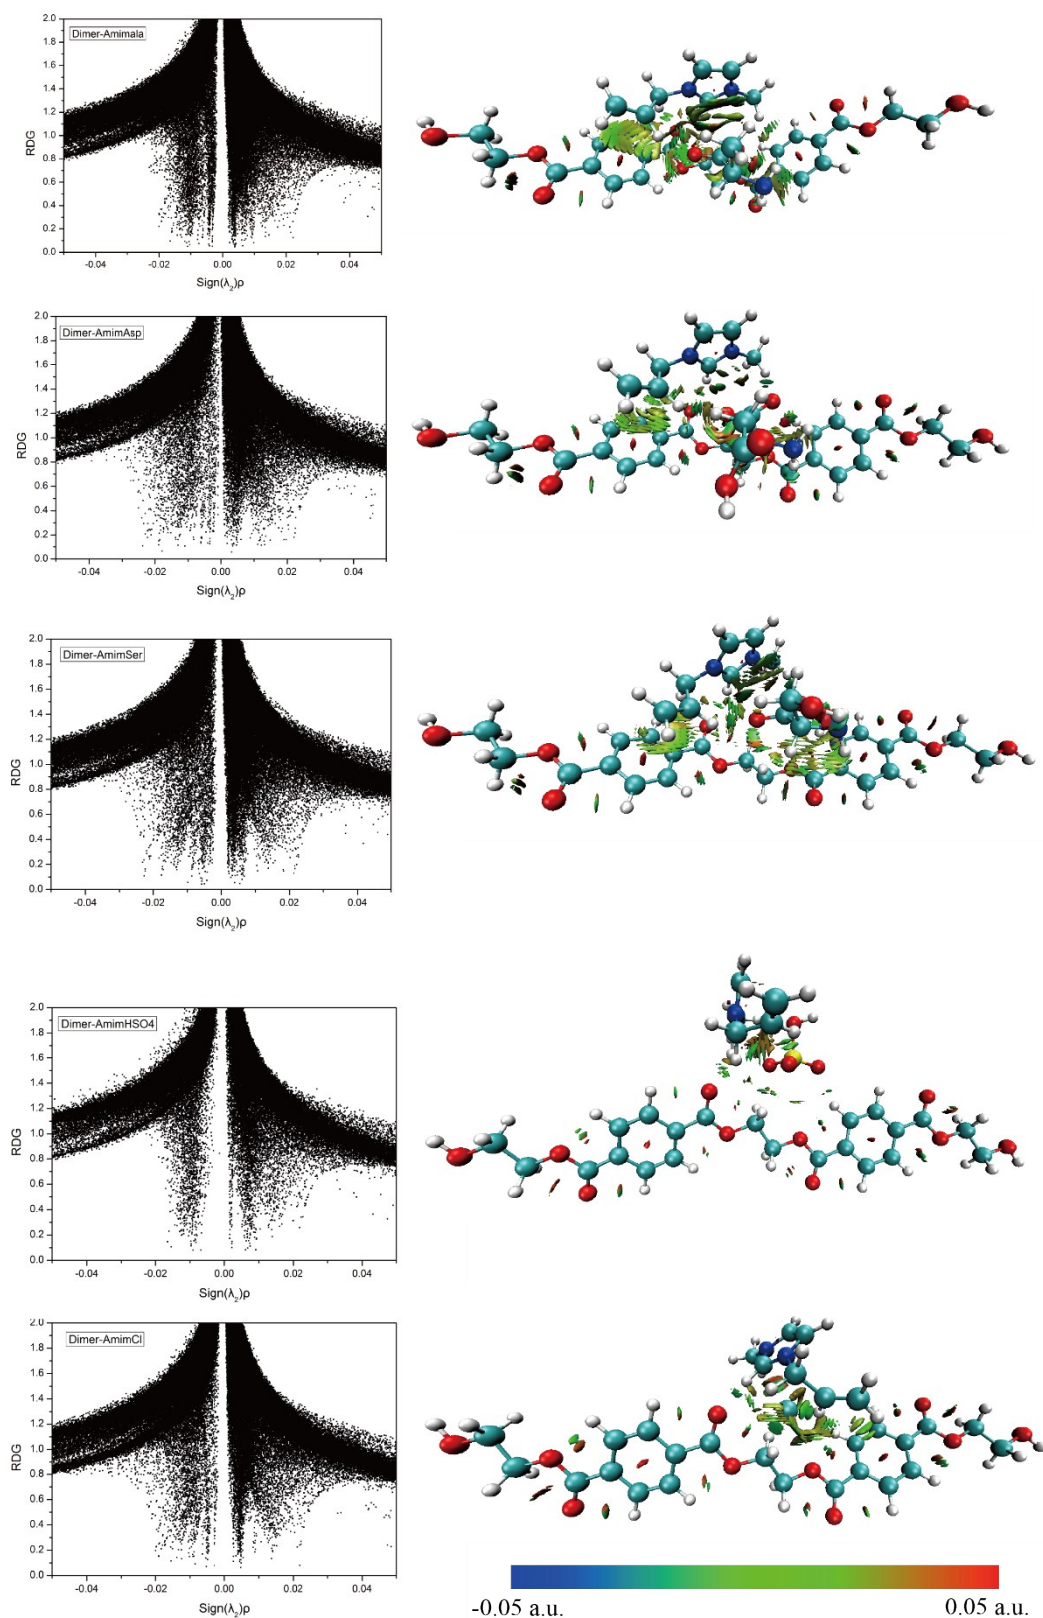

Fig. S9 RDG scatter plot (isovalve =0.5) and isosurfaces ( $s=0.7$ ) plots of the conformers: Dimer-AmimAla, Dimer-AmimAsp, Dimer-AmimSer, Dimer-AmimCl and Dimer-AmimHSO<sub>4</sub>. The isosurfaces are colored on a blue-green-red scale according to values of  $\text{sign}(\lambda_2)\rho$ , ranging from -0.05 to 0.05 a.u.. Red indicates strong attractive interactions, and blue indicates strong nonbonded overlap.

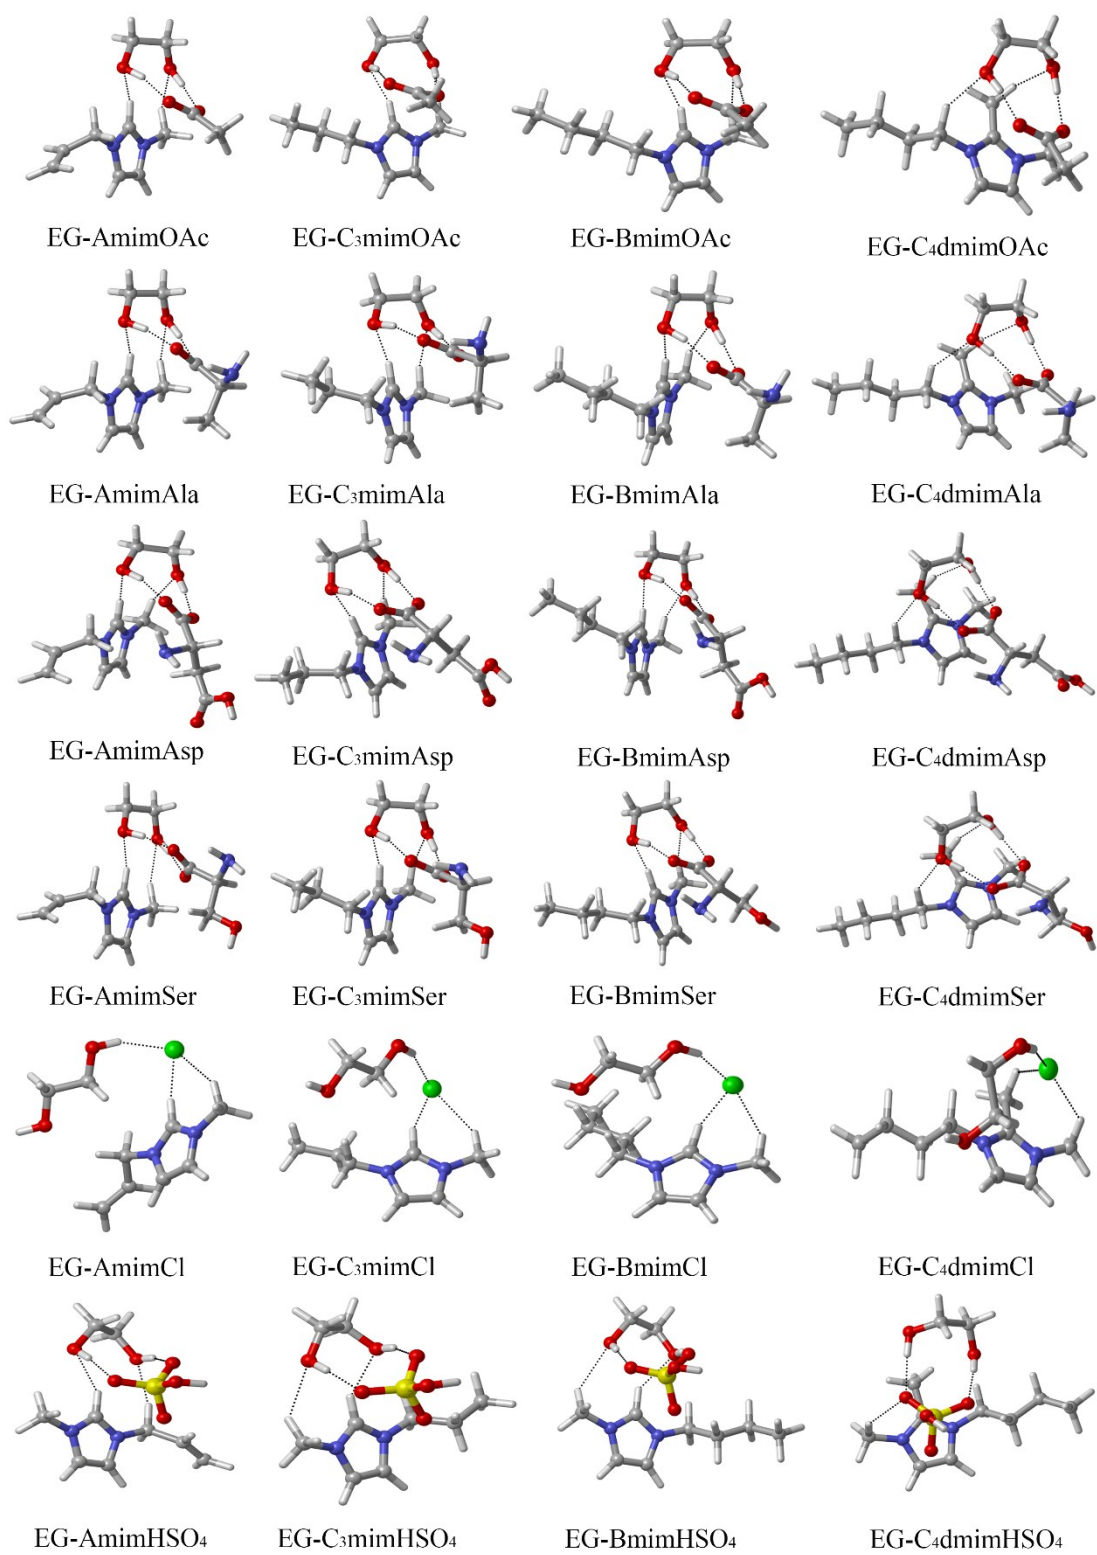

Fig. S10 Results of interaction energy calculation for the 24 kinds of EG and ionic liquids

Table S8 Calculated interaction energy at the B3LYP/6-31++G\*\* level of theory. (E-EG, C-cation, A-anion, CA-ion pairs)

| Entry | Structures                             | $\Delta E_{CA}$ (kJ/mol) | $\Delta E_{E-CA}$ (kJ/mol) | $\Delta E_{E-C-A}$ (kJ/mol) |
|-------|----------------------------------------|--------------------------|----------------------------|-----------------------------|
| 1     | EG-AmimOAc                             | -364.63                  | -136.86                    | -501.49                     |
| 2     | EG-C <sub>3</sub> mimOAc               | -357.35                  | -141.81                    | -499.16                     |
| 3     | EG-BmimOAc                             | -358.07                  | -139.74                    | -497.81                     |
| 4     | EG-C <sub>4</sub> dmimOAc              | -339.11                  | -133.74                    | -472.84                     |
| 5     | EG-AmimAla                             | -339.64                  | -142.11                    | -481.75                     |
| 6     | EG-C <sub>3</sub> mimAla               | -341.93                  | -137.29                    | -479.21                     |
| 7     | EG-BmimAla                             | -341.94                  | -135.89                    | -477.83                     |
| 8     | EG-C <sub>4</sub> dmimAla              | -320.03                  | -131.89                    | -451.92                     |
| 9     | EG-AmimAsp                             | -329.07                  | -140.33                    | -469.40                     |
| 10    | EG-C <sub>3</sub> mimAsp               | -328.61                  | -135.21                    | -463.81                     |
| 11    | EG-BmimAsp                             | -328.16                  | -134.30                    | -462.47                     |
| 12    | EG-C <sub>4</sub> dmimAsp              | -319.19                  | -122.65                    | -441.84                     |
| 13    | EG-AmimSer                             | -330.82                  | -141.13                    | -471.95                     |
| 14    | EG-C <sub>3</sub> mimSer               | -336.14                  | -133.63                    | -469.77                     |
| 15    | EG-BmimSer                             | -341.44                  | -138.32                    | -479.76                     |
| 16    | EG-C <sub>4</sub> dmimSer              | -315.24                  | -126.86                    | -442.10                     |
| 17    | EG-AmimHSO <sub>4</sub>                | -336.29                  | -114.00                    | -450.29                     |
| 18    | EG-C <sub>3</sub> mimHSO <sub>4</sub>  | -331.75                  | -113.35                    | -445.09                     |
| 19    | EG-BmimHSO <sub>4</sub>                | -330.87                  | -113.02                    | -443.89                     |
| 20    | EG-C <sub>4</sub> dmimHSO <sub>4</sub> | -331.46                  | -88.94                     | -420.40                     |
| 21    | EG-AmimCl                              | -374.78                  | -48.72                     | -423.50                     |
| 22    | EG-C <sub>3</sub> mimCl                | -373.97                  | -47.18                     | -421.15                     |
| 23    | EG-BmimCl                              | -372.78                  | -47.26                     | -420.04                     |
| 24    | EG-C <sub>4</sub> dmimCl               | -349.74                  | -63.43                     | -413.17                     |

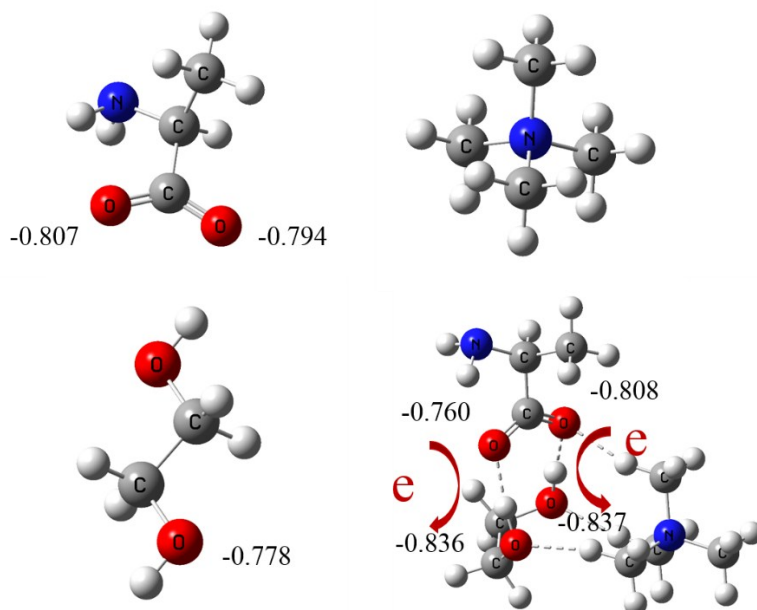

Fig. S11 The charge transfer when anion cation and EG interact

The interaction of ILs and EG makes the electronegativity of oxygen of hydroxyl in EG stronger, which are shown in Fig. S11. The NPA charges of both isolated  $N_{1111}^+$ ,  $Ala^-$ , EG and EG- $N_{1111}Ala$  are analyzed here. The total negative charge on anion increases from -1 to -0.82. The total positive charge on cation decreases from 1 to 0.90, and the total charge on EG decreases from 0 to -0.08, while a small charge transfer of 0.18 occurs from anion to cation and EG. Fig. S11D shows the direction of the charge transfer. The interaction of anion, cation and EG make the electronegativity of oxygen of hydroxyl in EG stronger than that of before interaction (from -0.778 to -0.836), which make the oxygen in EG prefer to attacking the carbon of the ester group in PET and finally results in degradation of PET.

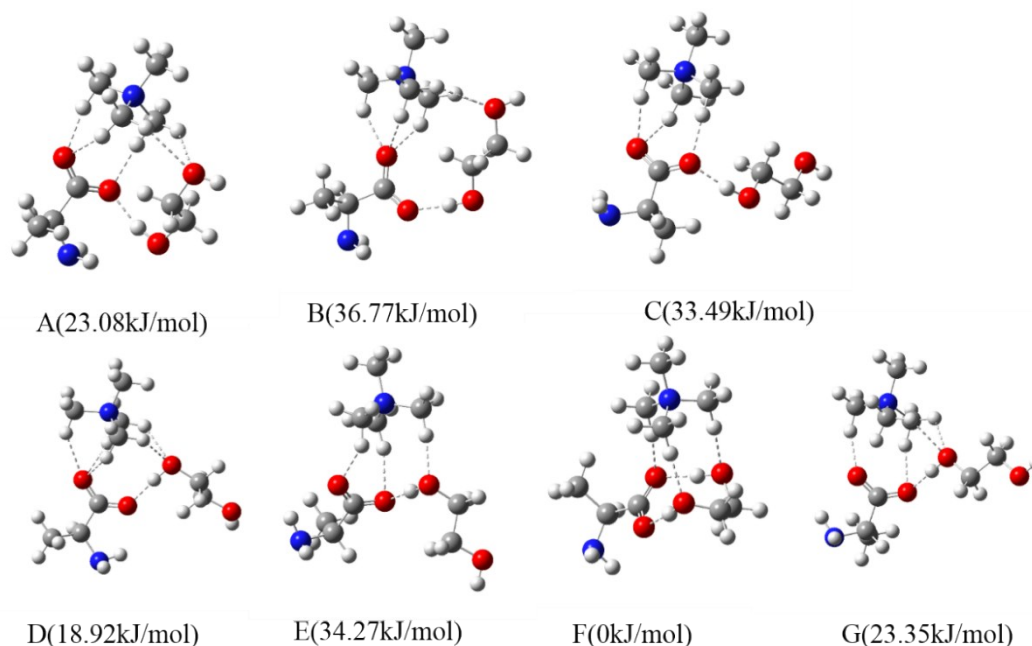

Fig. S12 optimized structures of anion, cation and EG by B3LYP/6-31++G\*\* with the relative energy (kJ/mol). O atoms (red), N atoms (blue), H atoms (light gray), C atoms (dark gray). The dashed lines note the H-bonds formed in the ion pairs

Table S9 Changes in bond length for EG while it interacts with N<sub>1111</sub>Ala

| Bond   | EG    | A     | B     | C     | D     | E     | F     | G     |
|--------|-------|-------|-------|-------|-------|-------|-------|-------|
| C1-C4  | 1.520 | 1.534 | 1.528 | 1.520 | 1.526 | 1.526 | 1.530 | 1.521 |
| C1-O9  | 1.429 | 1.439 | 1.447 | 1.405 | 1.416 | 1.416 | 1.417 | 1.414 |
| C4-O7  | 1.429 | 1.406 | 1.403 | 1.428 | 1.425 | 1.426 | 1.414 | 1.422 |
| O9-H10 | 0.965 | 0.966 | 0.964 | 0.988 | 1.003 | 1.004 | 0.998 | 0.996 |
| O7-H8  | 0.965 | 0.989 | 0.990 | 0.965 | 0.965 | 0.965 | 1.002 | 0.965 |

The interaction between EG and N<sub>1111</sub>Ala was studied in Fig. S12. it is found that there are different energy minimum structures (A-G) for the cooperation of EG with N<sub>1111</sub>Ala via H-bonds. The H-bonds are formed among the oxygen of carboxyl in Ala<sup>-</sup>, C-H of N<sub>1111</sub><sup>+</sup> and hydrogen of the hydroxyl in EG. Table S8 shows that the interaction between EG and N<sub>1111</sub>Ala will bring changes to the bond lengths (original 0.965 to 1.004), which renders the length of O-H of EG longer and causes the hydrogen to be lost more easily.
